# Supplementary material for: A long-cycle and high-rate Si/SiOx/nitrogen-doped carbon composite as an anode material for lithium-ion batteries
Source: Royal Society of Chemistry journal article supplement (doi:10.1039/c9nj04238e), 2019-01-01
Supplement: c9nj04238e1.pdf [file c9nj04238e1.pdf]

## Supporting Information

### **Long-Cycle and High-Rate Si/SiO<sub>x</sub>/Nitrogen-Doped Carbon Composite as an anode material for Lithium-Ion Batteries**

*Xiaoling He, Wei Zhao, Diandian Li, Peijun Cai\*, Quanchao Zhuang, Zhicheng Ju\**

Dr. X. He, Prof. P. Cai

School of Chemical Engineering and Technology, China University of Mining and Technology, Xuzhou, Jiangsu 221116, P. R. China.

Dr. W. Zhao, D. Li, Prof. Q. Zhuang, Z. Ju

The Jiangsu Province Engineering Laboratory of High Efficient Energy Storage Technology and Equipments, School of Materials Science and Engineering, China University of Mining and Technology, Xuzhou 221116, P.R. China.

E-mail: juzc@cumt.edu.cn; caipj@163.com

Prof. Z. Ju

Xuzhou B & C Information Chemical Co., Ltd. Xuzhou 221300, P.R. China.

Xiaoling He and Wei Zhao contributed to the work equally and should be regarded as co-first authors.

## **Contents:**

Figure S1. Photographs of the preparation process of the Si/PVP/KF colloidal solution.

Figure S2. TGA curve of the Si/SiO<sub>x</sub>/N-C

Figure S3. N<sub>2</sub> adsorption/desorption isotherms of (a) Si/SiO<sub>x</sub>/C and (c) Si/SiO<sub>x</sub>/N-C and the pore size distribution (b) Si/SiO<sub>x</sub>/C and (d) Si/SiO<sub>x</sub>/N-C

Figure S4. XPS survey spectrum (a) and Si 2p High-resolution XPS spectra (b) with Gaussian fitting of the pure Si.

Figure S5. CV curves of the Si electrode at the scan rate of 0.2 mV s<sup>-1</sup>.

Figure S6. CV curves of the Si electrode at various scan rates of 0.2-2 mV s<sup>-1</sup>.

Figure S7. Contribution ratio of the capacitance in the Si electrode at various scan rates.

Figure S8. SEM image of the Si/SiO<sub>x</sub>/N-C after 20 repeated cycles.

Table S1. Impedance parameters of the Si/SiO<sub>x</sub>/N-C, Si/SiO<sub>x</sub>/C and Si electrode.

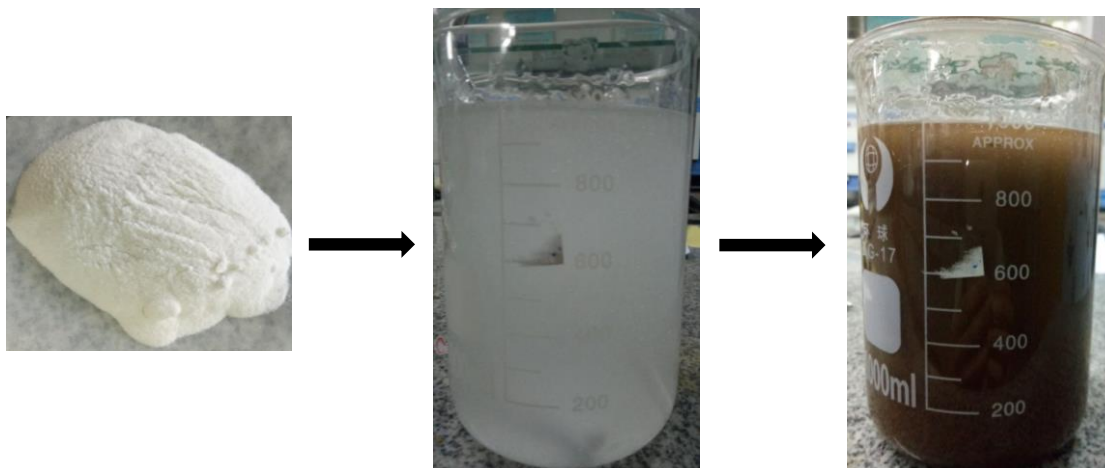

Figure S1. Photographs of the preparation process of the Si/PVP/KF colloidal solution.

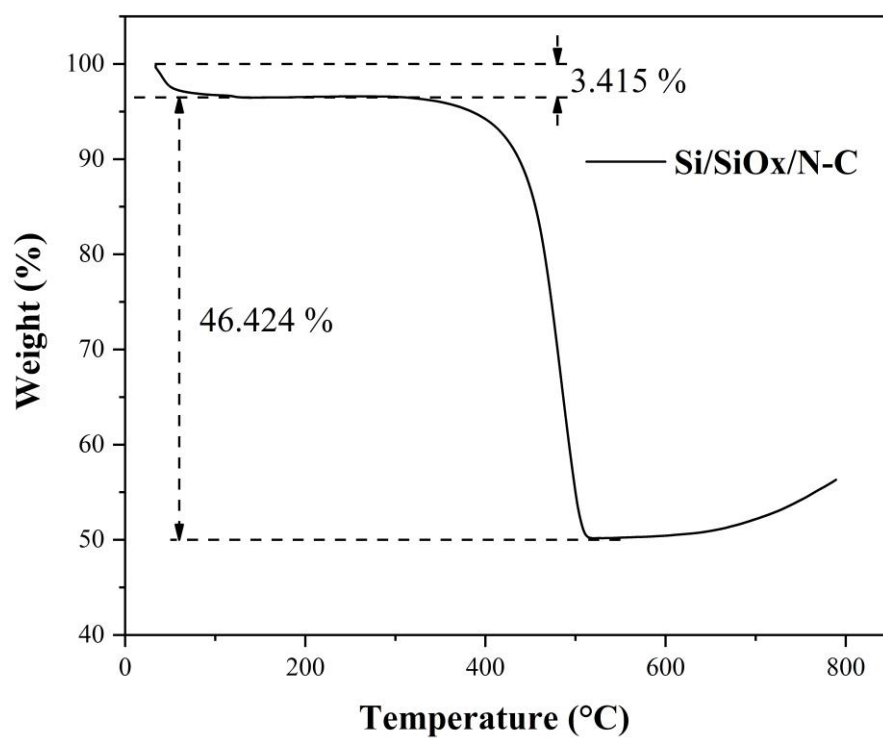

Figure S2. TGA curve of the Si/SiO<sub>x</sub>/N-C

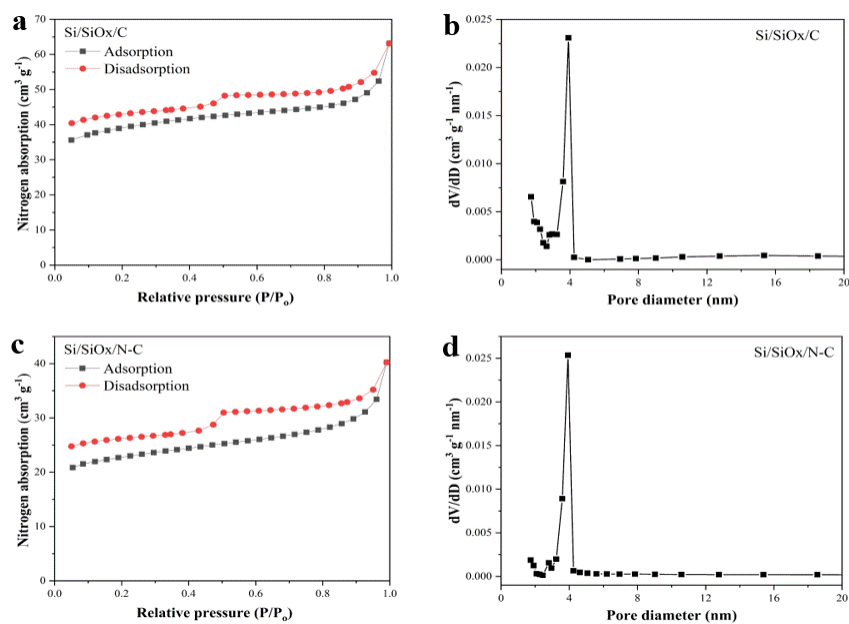

Figure S3. N<sub>2</sub> adsorption/desorption isotherms of (a) Si/SiOx/C and (c) Si/SiOx/N-C and the pore size distribution (b) Si/SiOx/C and (d) Si/SiOx/N-C.

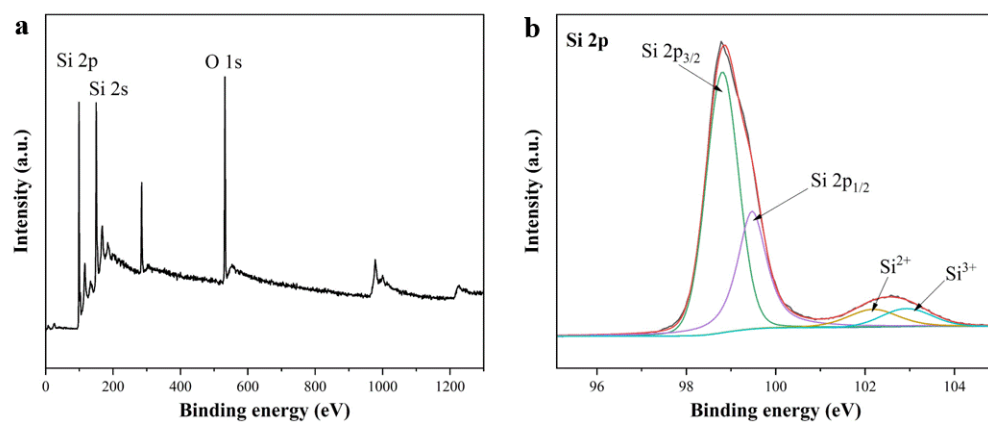

Figure S4. XPS survey spectrum (a) and Si 2p High-resolution XPS spectra (b) with Gaussian fitting of the pure Si.

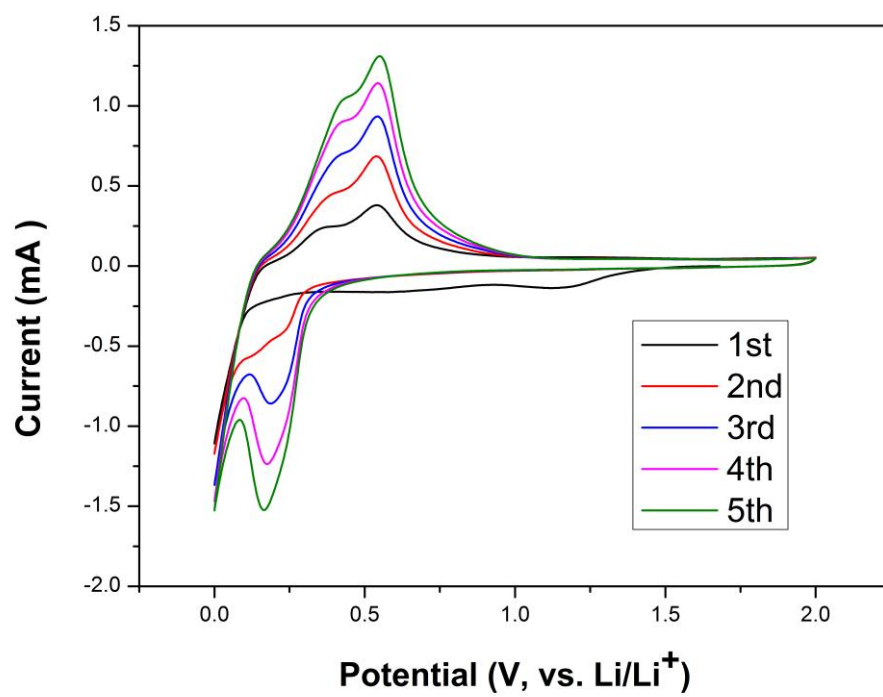

Figure S5. CV curves of the Si electrode at the scan rate of 0.2 mV s<sup>-1</sup>.

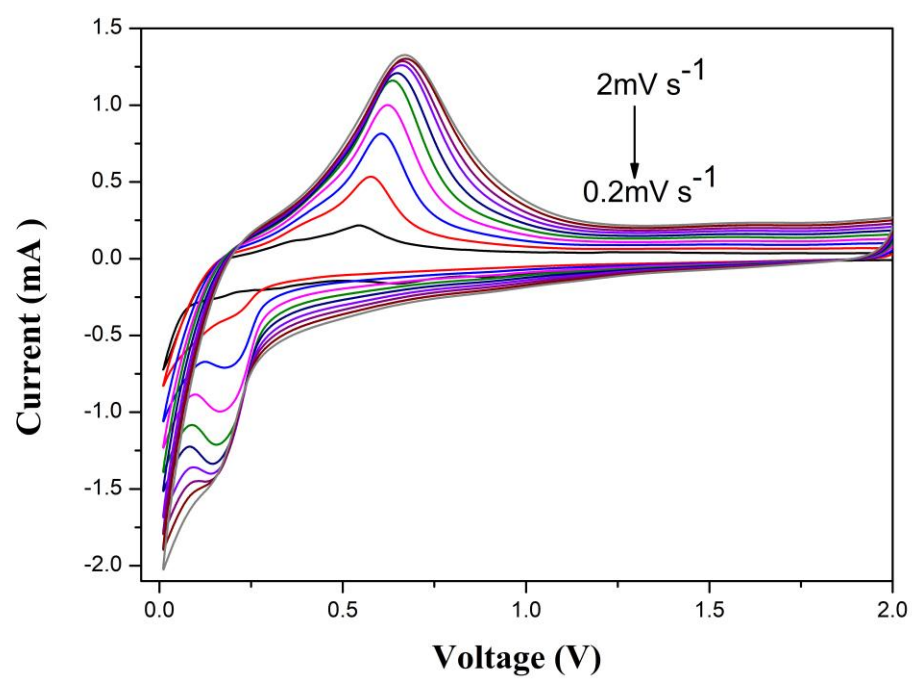

Figure S6. CV curves of the Si electrode at various scan rates of 0.2-2 mV s<sup>-1</sup>.



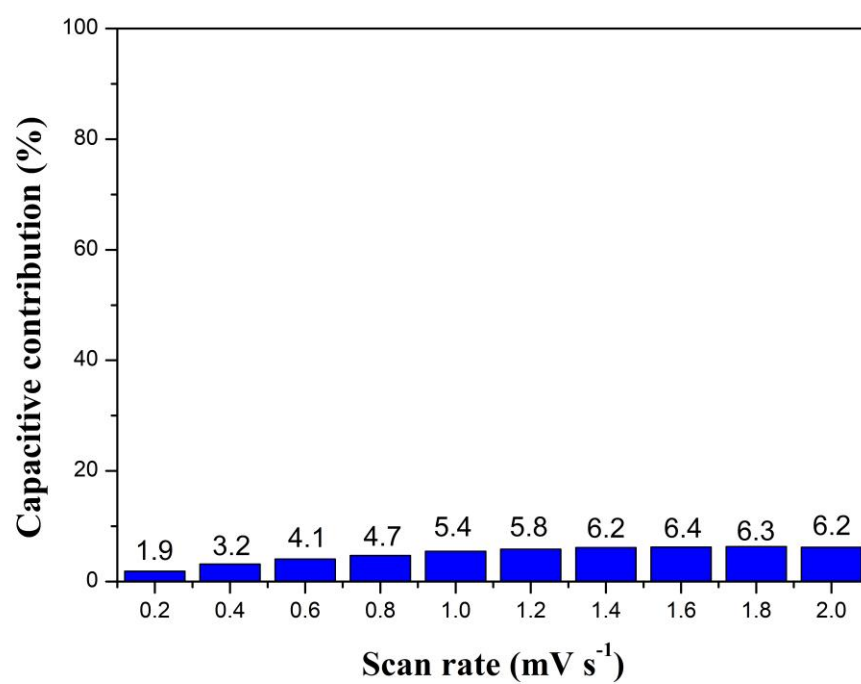

Figure S7. Contribution ratio of the capacitance in the Si electrode at various scan rates.

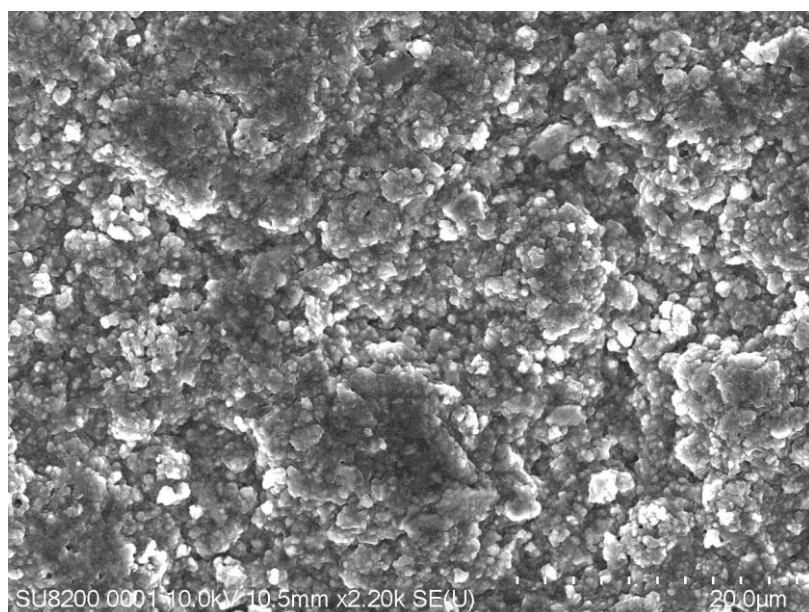

Figure S8. SEM image of the Si/SiO<sub>x</sub>/N-C after 20 repeated cycles

Table S1. Impedance parameters of the Si/SiO<sub>x</sub>/N-C, Si/SiO<sub>x</sub>/ C and Si electrodes.

| Samples                          | R <sub>s</sub> (Ω) | R <sub>ct</sub> (Ω) |
|----------------------------------|--------------------|---------------------|
| Si/SiO <sub>x</sub> /N-C (0th)   | 4.93               | 62.6                |
| Si/SiO <sub>x</sub> /N-C (100th) | 5.13               | 75.9                |
| Si/SiO <sub>x</sub> / C (0th)    | 4.89               | 112.1               |
| Si/SiO <sub>x</sub> / C (100th)  | 5.67               | 121.4               |
| Si (0th)                         | 4.33               | 148.6               |
| Si (100th)                       | 5.17               | 434.2               |
